# Supplementary material for: Structural phase transition in NH₄F under extreme pressure conditions
Source: PubMed Central journal article supplement (PMC11443071; doi:10.1038/s42004-024-01309-w), 2024-09-30
Supplement: 42004_2024_1309_MOESM2_ESM.pdf [file 42004_2024_1309_MOESM2_ESM.pdf]

# Supplementary Materials for

## Structural Phase Transition in NH<sub>4</sub>F under Extreme Pressure Conditions

Umbertoluca Ranieri<sup>1,2</sup>, Christophe Bellin<sup>3</sup>, Lewis J. Conway<sup>4,5</sup>, Richard Gaal<sup>6</sup>,  
John S. Loveday<sup>2</sup>, Andreas Hermann<sup>2</sup>, Abhay Shukla<sup>3</sup>, Livia E. Bove<sup>1,3,6</sup>

<sup>1</sup>Dipartimento di Fisica, Università di Roma La Sapienza, Piazzale Aldo Moro 5, 00185 Rome, Italy

<sup>2</sup>Centre for Science at Extreme Conditions and School of Physics and Astronomy, University of Edinburgh, Peter Guthrie Tait Road, EH9 3FD Edinburgh, United Kingdom

<sup>3</sup>Institut de Minéralogie, de Physique des Matériaux et de Cosmochimie, Sorbonne Université, CNRS UMR 7590, 5 Place Jussieu, 75005 Paris, France

<sup>4</sup>Department of Materials Science and Metallurgy, University of Cambridge, 27 Charles Babbage Road, Cambridge CB30FS, United Kingdom

<sup>5</sup>Advanced Institute for Materials Research, Tohoku University, Sendai, 980-8577, Japan

<sup>6</sup>Laboratory of Quantum Magnetism, Institute of Physics, École Polytechnique Fédérale de Lausanne, CH-1015 Lausanne, Switzerland

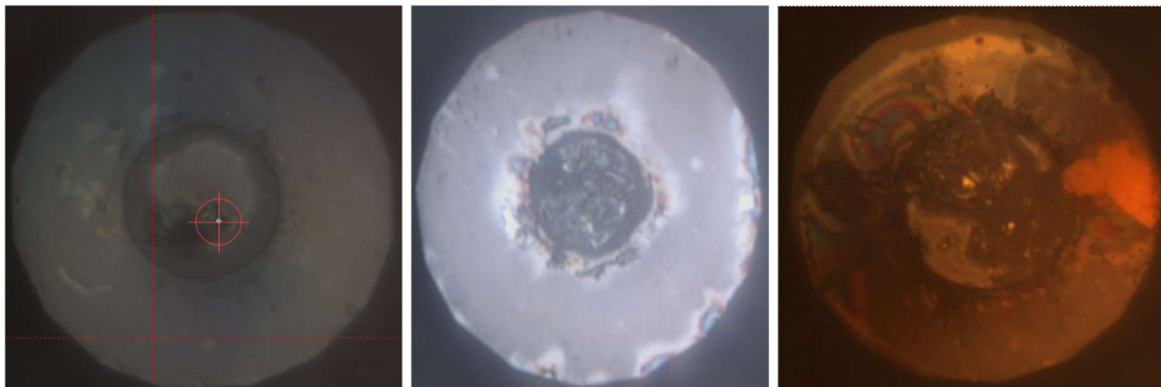

Supplementary Figure 1: Photomicrographs of the three samples of this work: DAC#1 at 6 GPa (left), DAC#2 at 7 GPa (middle), and DAC#3 at 4 GPa (right). The full scale of each of the three images is about 100  $\mu\text{m}$ .

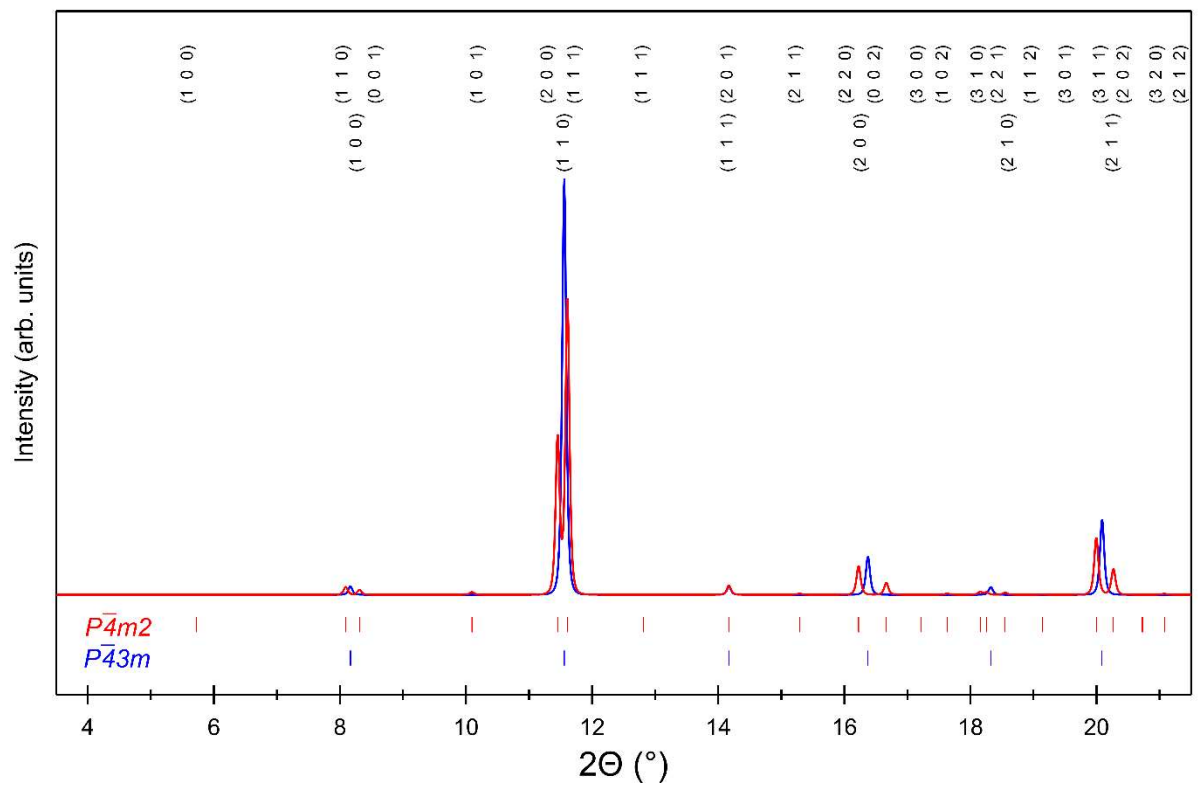

Supplementary Figure 2: Calculated X-ray diffraction patterns for perfect powders of NH<sub>4</sub>F-*P-4m2* ( $a=4.11 \text{ \AA}$  and  $c=2.83 \text{ \AA}$ ) and NH<sub>4</sub>F-*P-43m* ( $a=2.88 \text{ \AA}$ ), both at 50 GPa ( $\lambda= 0.4101 \text{ \AA}$ ). Tick marks indicate the positions of the Bragg reflections and Miller indices are also reported.

Supplementary Table 1: DFT-optimised crystal structures of the three NH<sub>4</sub>F phases encountered in this work. The pressure-dependent F-displacement magnitudes are highlighted in bold; zero displacement would correspond to  $z_F=0$  for NH<sub>4</sub>F-III and to  $z_F=1/2$  for NH<sub>4</sub>F-VIII. The corresponding crystallographic information files are provided with this manuscript.

| Phase                              | Crystal system | Space Group               | P (GPa) | Lattice parameters                    | Volume (Å <sup>3</sup> ) | Atom Site x y z                                                                                    |
|------------------------------------|----------------|---------------------------|---------|---------------------------------------|--------------------------|----------------------------------------------------------------------------------------------------|
| NH <sub>4</sub> F-III              | cubic          | <i>P-43m</i><br>(n. 215)  | 20      | a=b=c=3.064 Å<br>α=β=γ=90°            | 28.77                    | N 1b ½ ½ ½<br>H 4e 0.3043 0.3043<br>0.3043<br>F 1a 0 0 0                                           |
| NH <sub>4</sub> F-III <sub>t</sub> | tetragonal     | <i>P-4m2</i><br>(n. 115)  | 80      | a=b=4.010 Å<br>c=2.722 Å<br>α=β=γ=90° | 43.76                    | N 1c ½ ½ ½<br>N 1d 0 0 ½<br>H 4k 0.2917 ½ 0.7128<br>H 4j 0 0.2083 0.2872<br>F 2g 0 ½ <b>0.0367</b> |
| NH <sub>4</sub> F-VIII             | tetragonal     | <i>P4/nmm</i><br>(n. 129) | 120     | a=b=3.899 Å<br>c=2.552 Å<br>α=β=γ=90° | 38.80                    | N 2a 0 0 0<br>H 8i 0 0.2106 0.7706<br>F 2c 0 ½ <b>0.4226</b>                                       |

Supplementary Table 2: DFT-optimised crystal structure of the hypothetical NH<sub>4</sub>F-III<sub>t</sub> phase with space group *P-42m* discussed in ref. 1.

| Phase                              | Crystal system | Space Group              | P (GPa) | Lattice parameters                    | Volume (Å <sup>3</sup> ) | Atom Site x y z                                       |
|------------------------------------|----------------|--------------------------|---------|---------------------------------------|--------------------------|-------------------------------------------------------|
| NH <sub>4</sub> F-III <sub>t</sub> | tetragonal     | <i>P-42m</i><br>(n. 111) | 80      | a=b=2.835 Å<br>c=2.722 Å<br>α=β=γ=90° | 21.88                    | N 1b ½ ½ ½<br>H 4n 0.708 0.708<br>0.287<br>F 1a 0 0 0 |

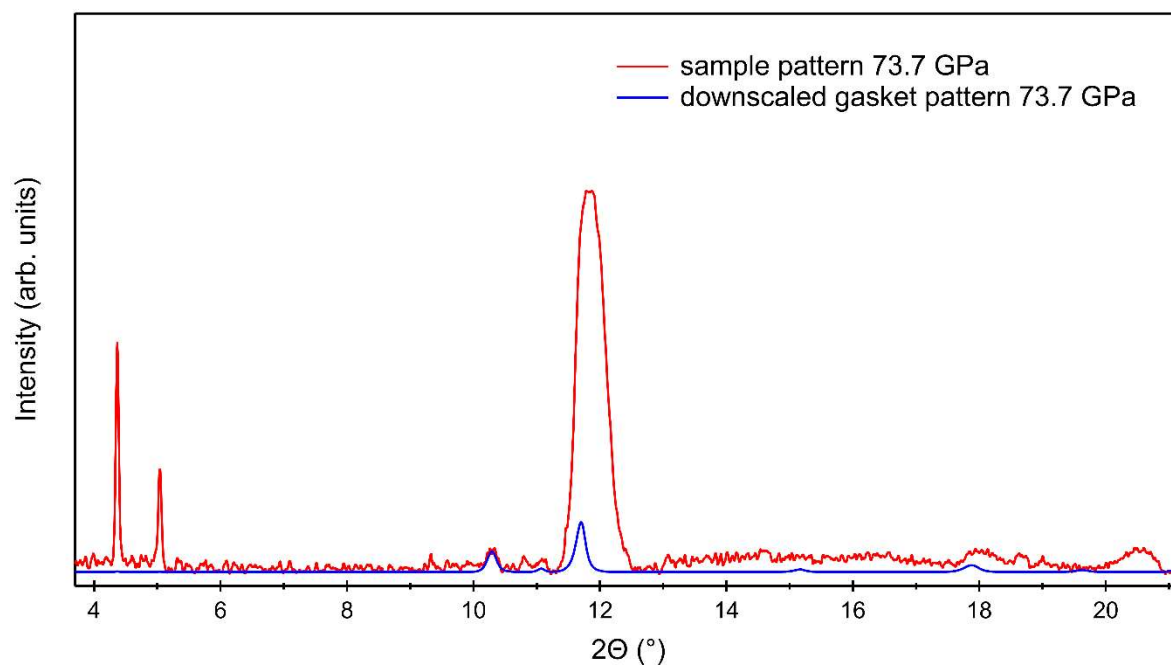

Supplementary Figure 3: Example of X-ray diffraction pattern collected on the Re gasket, together with the sample pattern at the same pressure of 73.7 GPa ( $\lambda = 0.4101 \text{ \AA}$ ). The intensity of the Re pattern was arbitrarily scaled so that the Re (1 0 0) reflection at  $10.3^\circ$  has about the same magnitude in the two patterns. One can see that the Re (1 0 1) reflection at  $11.7^\circ$  overlaps with the  $\text{NH}_4\text{F}$  signal but it is much weaker.

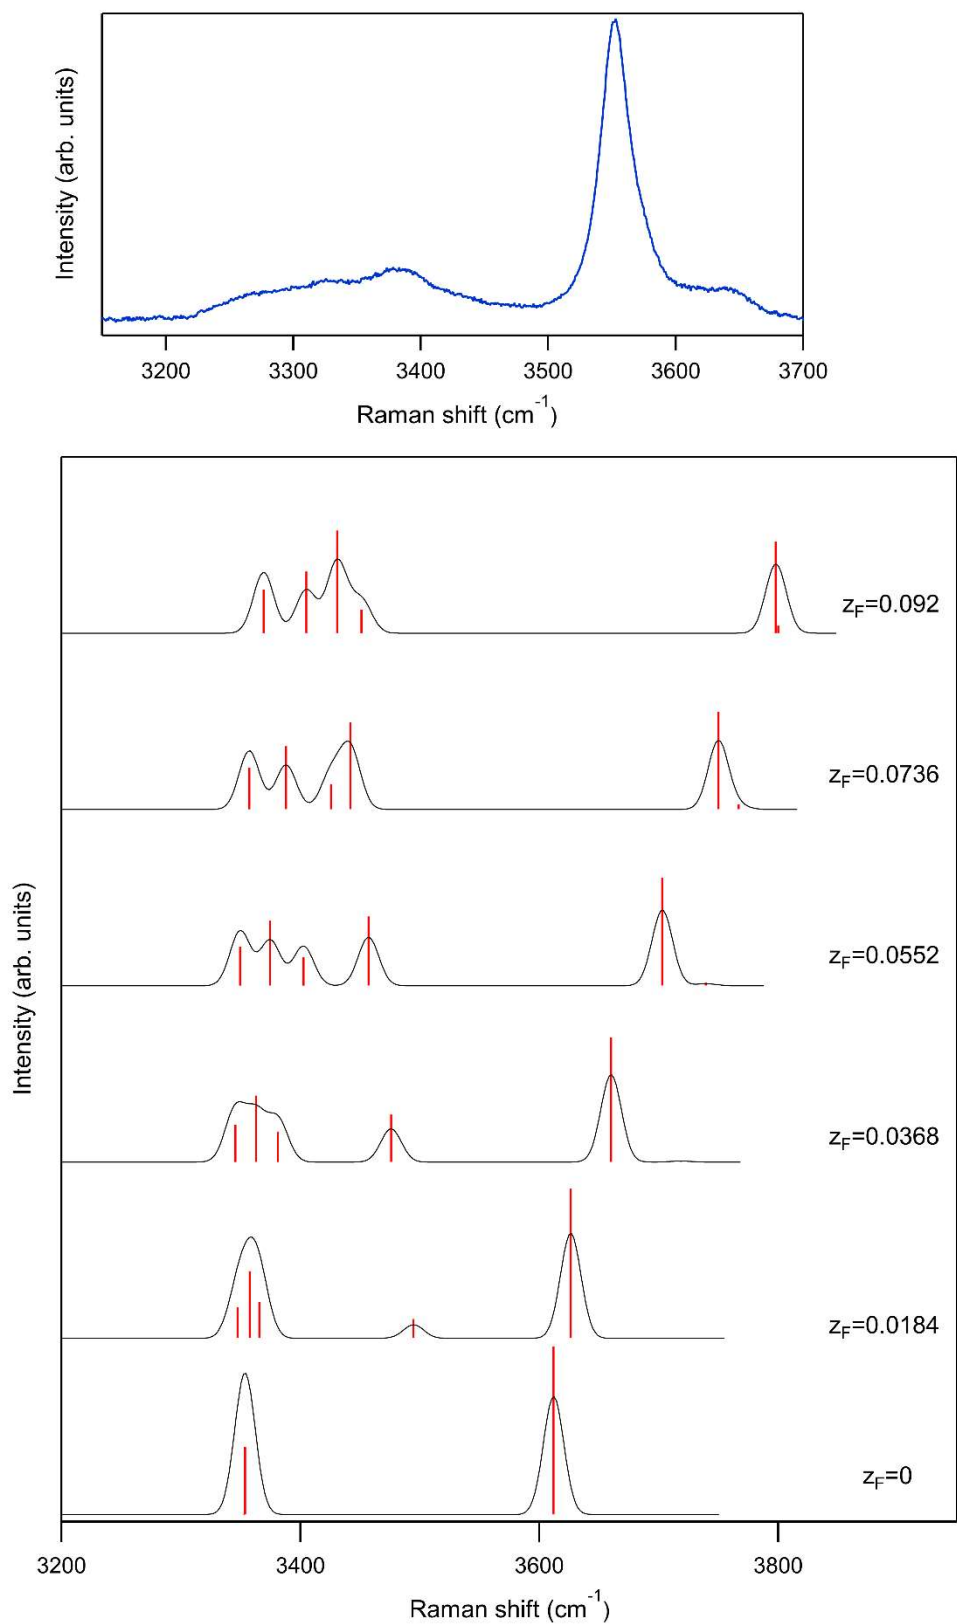

Supplementary Figure 4: Experimental Raman spectrum at 114 GPa (top) and calculated Raman spectra of NH<sub>4</sub>F-*P-4m2* at 114 GPa for different z-displacements of the F atom in the unit cell (bottom). All spectra were Gaussian-broadened with the same width. Spectra were calculated with steps of

0.00184 in the coordinate  $z_F$ . Thirty spectra were simulated in total. The best agreement with the experimental spectrum was estimated to be for  $z_F=0.04048$ . This is based on i) the difference in frequency between features and ii) the shapes obtained by merging individual mode intensities upon applying the Gaussian broadening. Note that there is a high-frequency peak which is calculated to be very weak but which is clearly seen experimentally ( $100\text{ cm}^{-1}$  right of the main peak).

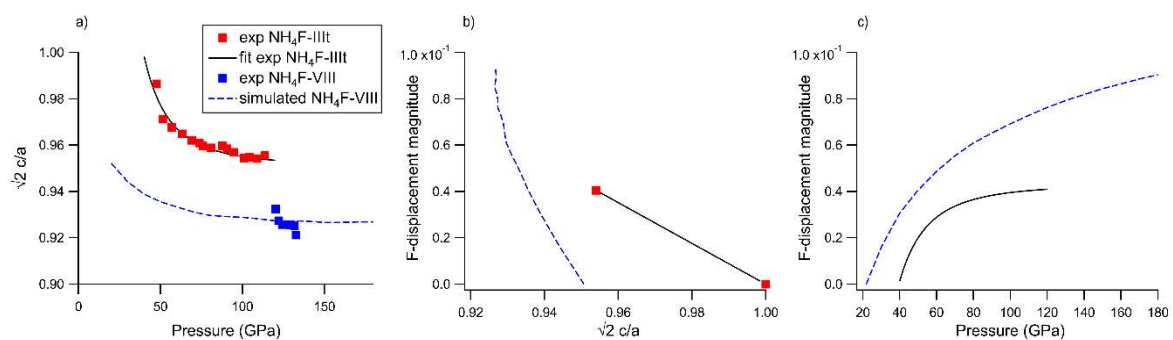

Supplementary Figure 5: (a)  $\sqrt{2} c/a$  ratio as a function of pressure, (b) F-displacement magnitude as a function of  $\sqrt{2} c/a$  ratio and (c) F-displacement magnitude as a function of pressure. Legend of panel a also applies to panels b and c. Symbols represent experimental data, dashed lines represent DFT calculations. The black curve of panel a is a fit to the experimental data for  $\text{NH}_4\text{F-III}$ . The black curve of panel b is a linear interpolation between the values  $z_F=0$  at 40 GPa and  $z_F=0.04048$  at 114 GPa. The black curves of panels a and b were used to deduce the black curve of panel c. Finally, the black curve of panel c was used to impose  $z_F$  in the simulations of the Raman spectra of phase III at various pressures (reported in Fig. 4 of the main text).

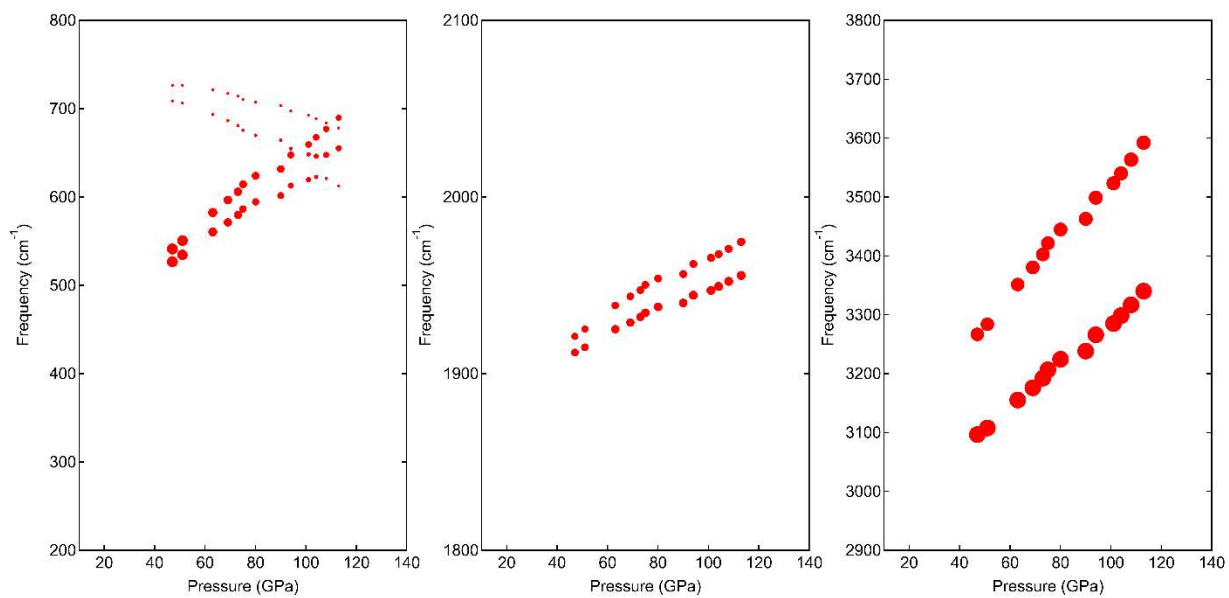

Supplementary Figure 6: Theoretical Raman lattice mode (left), bending region (center), and stretching region (right) frequencies for  $\text{NH}_4\text{F-P-42m}$ . The size of the dots is given by the intensity of the Raman peaks.



Supplementary Table 3: Mode assignment for Raman-active  $\Gamma$  phonons of the  $P-43m$  phase, point group  $T_d$ , as calculated from lattice dynamics and assessed from displacement eigenvector. Calculated frequencies and intensities from DFT lattice dynamics are given for 100 GPa. Acoustic modes have zero frequency and are omitted.

| Symmetry | $\nu$ ( $\text{cm}^{-1}$ ) | Relative intensity |
|----------|----------------------------|--------------------|
| T2       | 663.9                      | 0.0029             |
| T2       | 1370.3                     | 0.0003             |
| E        | 1959.0                     | 0.0316             |
| T2       | 3303.5                     | 1                  |
| A1       | 3547.1                     | 0.8148             |

Supplementary Table 4: Mode assignment for Raman-active  $\Gamma$  phonons of the  $P-4m2$  phase, point group  $D2d$ , as calculated from lattice dynamics and assessed from displacement eigenvector. Calculated frequencies from DFT lattice dynamics are given for 100 GPa. Acoustic modes have zero frequency and are omitted.

| Symmetry | $\nu$ ( $\text{cm}^{-1}$ ) | Relative intensity |
|----------|----------------------------|--------------------|
| E        | 150.9                      | 3E-07              |
| A        | 472.6                      | 4.84E-05           |
| B        | 513.1                      | 6E-08              |
| E        | 542.7                      | 0.0005             |
| B        | 633.3                      | 0.0015             |
| E        | 659.2                      | 0.0029             |
| E        | 763.9                      | 0.0016             |
| E        | 810.8                      | 3.2E-07            |
| B        | 1349.8                     | 3.24E-06           |
| E        | 1365.7                     | 0.0006             |
| E        | 1548.8                     | 1.99E-06           |
| B        | 1575.9                     | 5.12E-05           |
| A        | 1637.6                     | 2.36E-05           |
| A        | 1816.3                     | 0.0008             |

|   |        |        |
|---|--------|--------|
|   |        |        |
| A | 1949.5 | 0.0276 |
| A | 1961.5 | 0.0244 |
| E | 3299.1 | 0.5620 |
| B | 3305.7 | 0.5595 |
| E | 3318.7 | 0.4782 |
| A | 3420.0 | 0.3376 |
| A | 3581.1 | 1      |
| B | 3647.9 | 0.0083 |

Supplementary Table 5: Mode assignment for Raman-active  $\Gamma$  phonons of the  $P4/nmm$  phase, point group  $D4h$ , as calculated from lattice dynamics and assessed from displacement eigenvector. Calculated frequencies from DFT lattice dynamics are given for 100 GPa. Acoustic modes have zero frequency and are omitted.

| <b>Symmetry</b> | <b><math>\nu</math> (cm<sup>-1</sup>)</b> | <b>Relative intensity</b> |
|-----------------|-------------------------------------------|---------------------------|
| Eg              | 191.1                                     | 0.0008                    |
| B2g             | 392.5                                     | 0.0005                    |
| A1g             | 456.4                                     | 0.0080                    |
| Eg              | 735.4                                     | 0.0003                    |
| Eg              | 761.5                                     | 1.24E-05                  |
| B2g             | 1370.9                                    | 0.0001                    |
| Eg              | 1525.2                                    | 2.12E-05                  |
| A1g             | 1981.2                                    | 0.0207                    |
| B1g             | 2034.3                                    | 0.0199                    |
| B2g             | 3371.0                                    | 0.4184                    |
| Eg              | 3418.1                                    | 0.6769                    |
| A1g             | 3594.0                                    | 1                         |

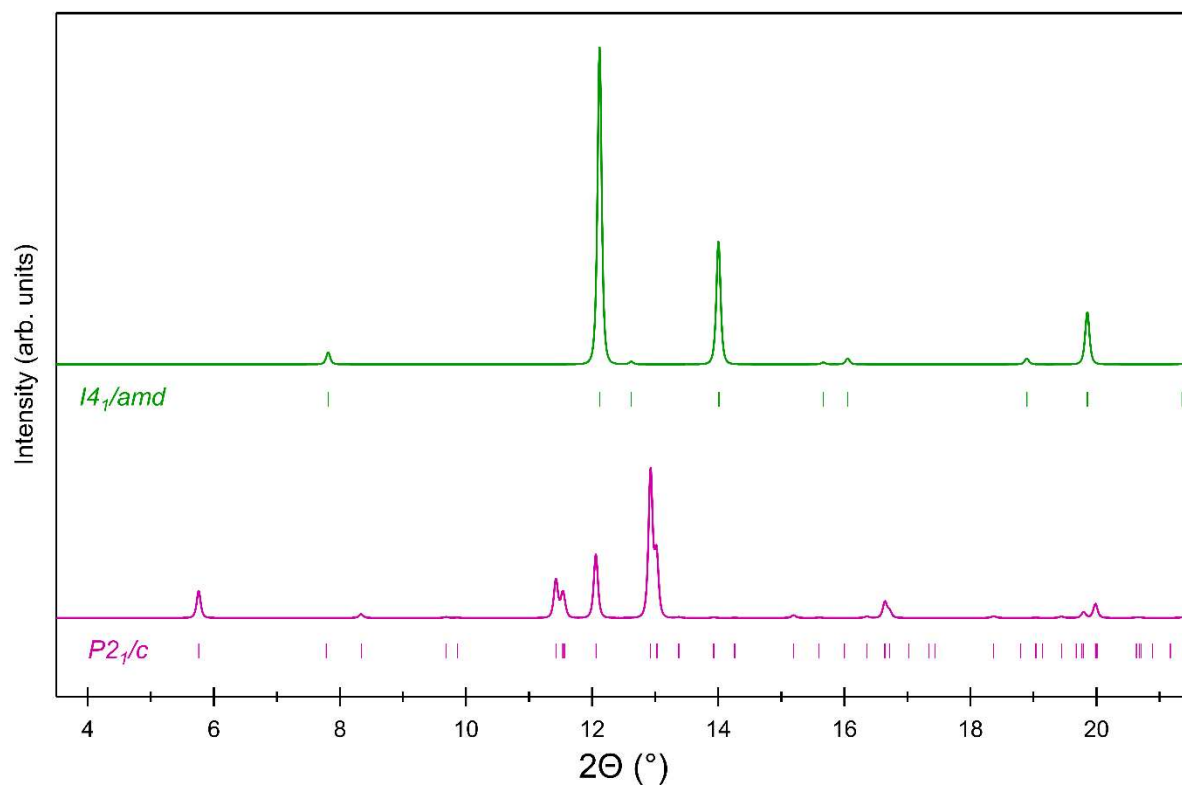

Supplementary Figure 7: Calculated X-ray diffraction patterns for perfect powders of  $\text{NH}_4\text{F}-I4_1/amd$  and  $\text{NH}_4\text{F}-P2_1/c$  at 130 GPa ( $\lambda = 0.4101 \text{ \AA}$ ). Tick marks indicate the positions of the Bragg reflections. Detailed structural information on these two structures is given in ref. 2.

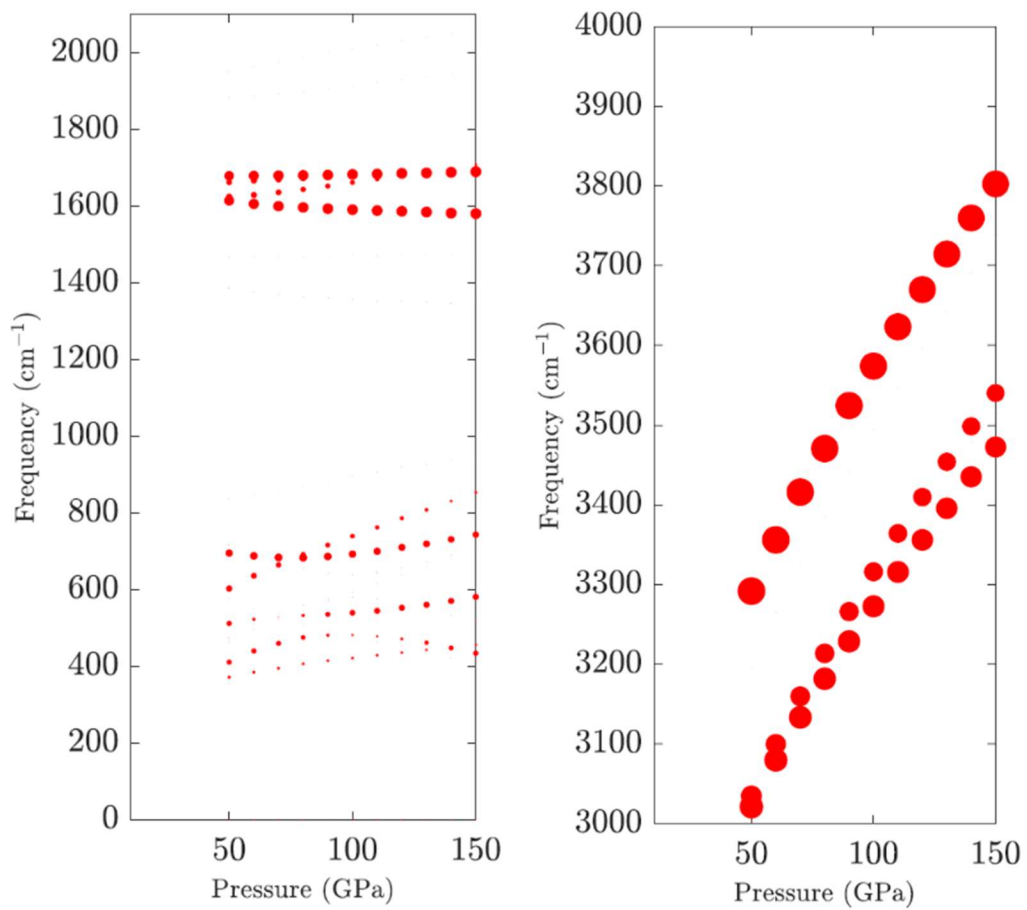

Supplementary Figure 8: Theoretical Raman lattice mode (left) and stretching region (right) frequencies for NH<sub>4</sub>F-14<sub>1</sub>/amd. The size of the dots is given by the intensity of the Raman peaks.

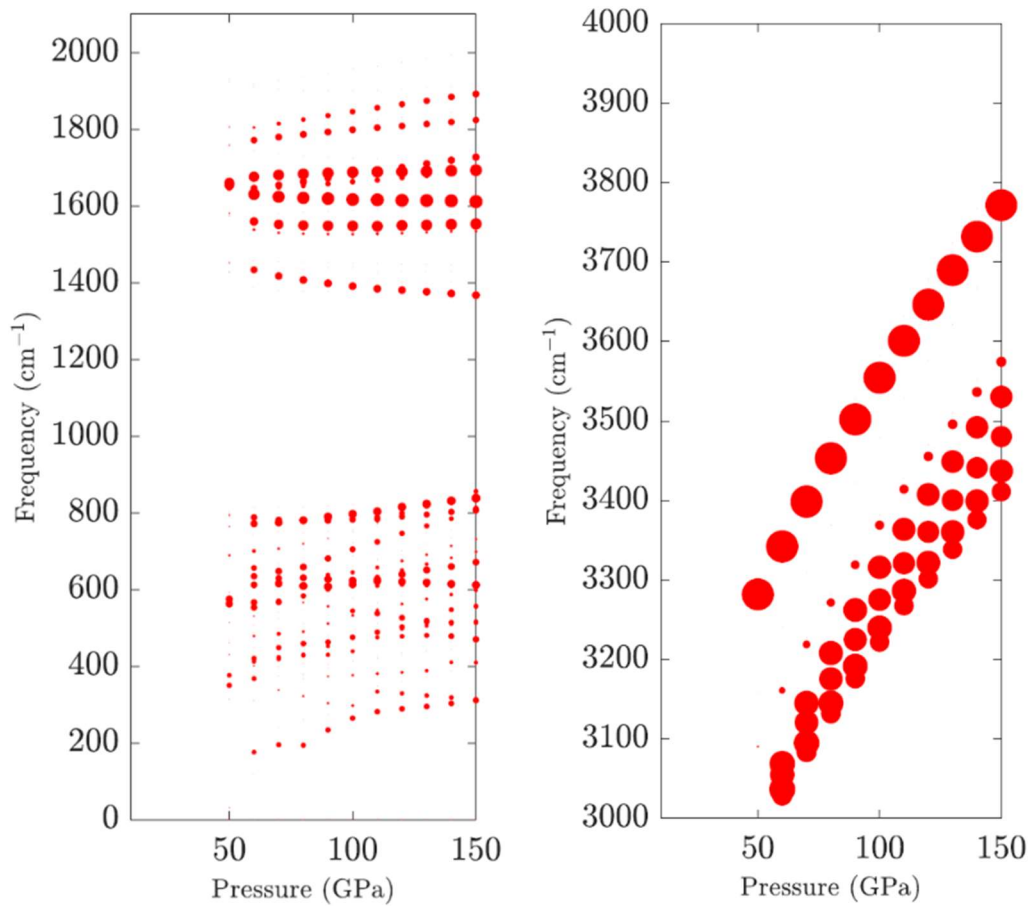

Supplementary Figure 9: Theoretical Raman lattice mode (left) and stretching region (right) frequencies for NH<sub>4</sub>F-P2<sub>1</sub>/c. The size of the dots is given by the intensity of the Raman peaks.

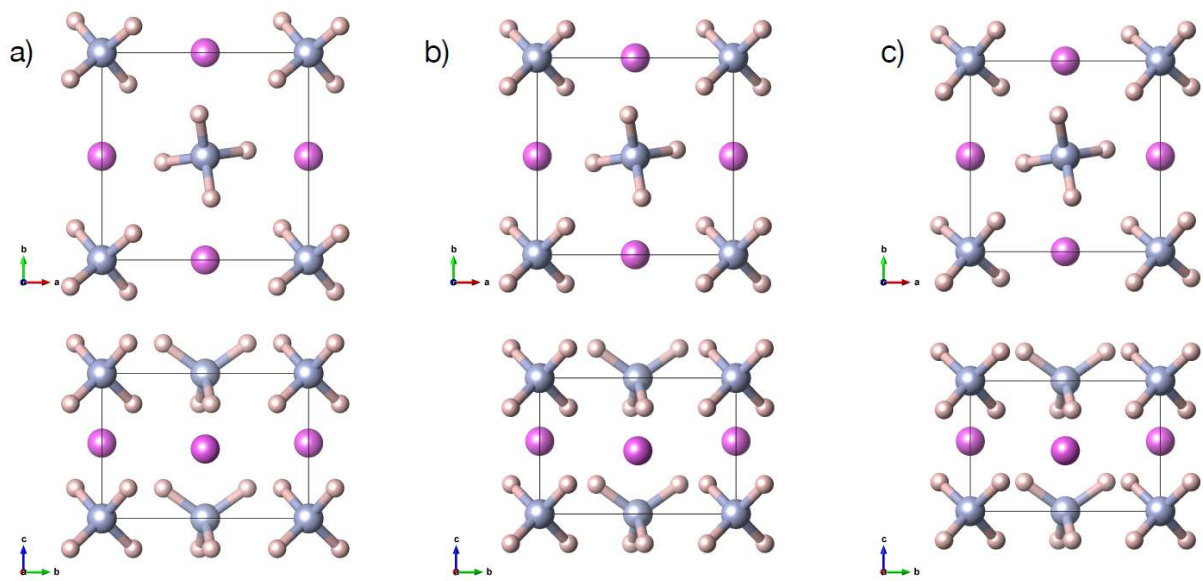

Supplementary Figure 10: Crystal structures of the saddle points along the NEB transition paths from phase III to phase VIII. a–c) Structures at 50/100/150 GPa, respectively. Top/bottom row are top/side views, all to the same scale.

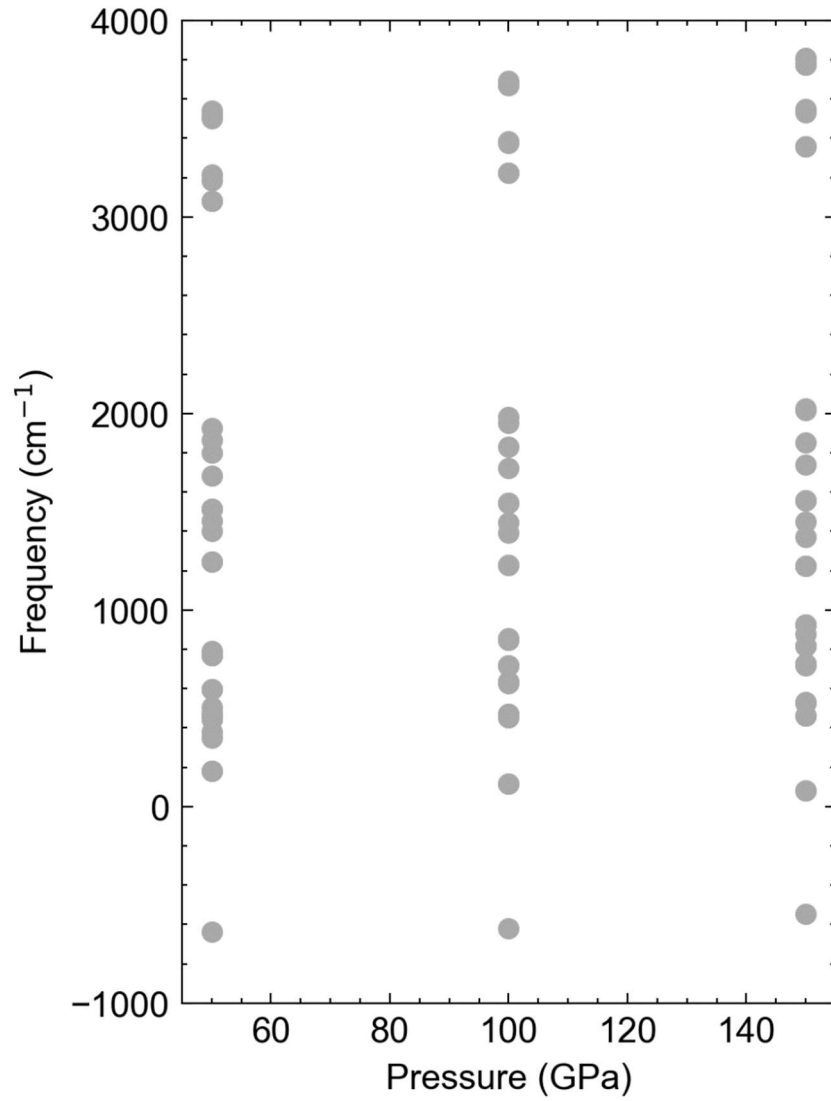

Supplementary Figure 11: Theoretical Raman frequencies at the saddle points along the NEB transition paths from phase III to phase VIII, at 50/100/150 GPa.

Supplementary Table 6: Crystal structure information of the saddle points along the NEB transition paths from phase III to phase VIII. All structures are in the tetragonal space group  $P-4$  (n. 81). The corresponding crystallographic information files are provided with this manuscript.

| Pressure (GPa) | Lattice parameters                             | Volume ( $\text{\AA}^3$ ) | Atom Site x y z                                                                                                                           |
|----------------|------------------------------------------------|---------------------------|-------------------------------------------------------------------------------------------------------------------------------------------|
| 50             | a=b=4.100 $\text{\AA}$<br>c=2.864 $\text{\AA}$ | 48.13 $\text{\AA}^3$      | N 1a 0 0 0<br>N 1c $\frac{1}{2}$ $\frac{1}{2}$ 0<br>H 4h 0.1520 0.1277 0.2090<br>H 4h 0.5287 0.2972 0.2081<br>F 2g 0 $\frac{1}{2}$ 0.4796 |
| 100            | a=b=3.893 $\text{\AA}$<br>c=2.689 $\text{\AA}$ | 40.74 $\text{\AA}^3$      | N 1a 0 0 0<br>N 1c $\frac{1}{2}$ $\frac{1}{2}$ 0<br>H 4h 0.1477 0.1447 0.2180<br>H 4h 0.5338 0.2897 0.2177<br>F 2g 0 $\frac{1}{2}$ 0.4650 |
| 150            | a=b=3.771 $\text{\AA}$<br>c=2.578 $\text{\AA}$ | 36.66 $\text{\AA}^3$      | N 1a 0 0 0<br>N 1c $\frac{1}{2}$ $\frac{1}{2}$ 0<br>H 4h 0.1377 0.1613 0.2229<br>H 4h 0.5358 0.2852 0.2227<br>F 2g 0 $\frac{1}{2}$ 0.4638 |



### **Supplementary References**

[1] C. Bellin *et al.* Phys. Rev. B 96, 094110 (2017).

[2] L. J. Conway, K. Brown, J. S. Loveday, A. Hermann, J. Chem. Phys. 154, 204501 (2021).
