# Supplementary material for: Structural phase transition in NH₄F under extreme pressure conditions
Source: PubMed Central journal article supplement (PMC11443071; doi:10.1038/s42004-024-01309-w), 2024-09-30
Supplement: 42004_2024_1309_MOESM3_ESM.pdf [file 42004_2024_1309_MOESM3_ESM.pdf]

# Description of Additional Supplementary Files

**File name: Supplementary Data 1**

**Description:** DFT-optimised crystal structure of NH<sub>4</sub>F-III at 20 GPa

**File name: Supplementary Data 2**

**Description:** DFT-optimised crystal structure of NH<sub>4</sub>F-III<sub>t</sub> at 80 GPa

**File name: Supplementary Data 3**

**Description:** DFT-optimised crystal structure of NH<sub>4</sub>F-VIII at 120 GPa

**File name: Supplementary Data 4**

**Description:** Crystal structure information of the saddle point along the NEB transition path from phase III to phase VIII at 50 GPa

**File name: Supplementary Data 5**

**Description:** Crystal structure information of the saddle point along the NEB transition path from phase III to phase VIII at 100 GPa

**File name: Supplementary Data 6**

**Description:** Crystal structure information of the saddle point along the NEB transition path from phase III to phase VIII at 150 GPa
